# Supplementary material for: LC-MS/MS Method for the Quantification of PARP Inhibitors Olaparib, Rucaparib and Niraparib in Human Plasma and Dried Blood Spot: Development, Validation and Clinical Validation for Therapeutic Drug Monitoring
Source: MDPI journal article supplement (doi:10.3390/pharmaceutics15051524), 2023-05-18
Supplement: s1 [file s1]

## Supplementary material

**Table S1.** General (source and gas) mass spectrometric parameters.

|                        |                          |
|------------------------|--------------------------|
| Ion Source             | Turbo Spray              |
| Polarity               | Positive ionisation mode |
| Curtain gas (CUR)      | 35 a.u.                  |
| Collision gas (CAD)    | 3 a.u.                   |
| IonSpray Voltage (IS)  | 1500 V                   |
| Temperature (TEM)      | 450 °C                   |
| Ion Source Gas 1 (GS1) | 40 a.u.                  |
| Ion Source Gas 2 (GS2) | 50 a.u.                  |

a.u.: arbitrary units.

**Table S2.** Analytes specific mass spectrometric parameters, listed in the exact acquisition order.

| Analyte      | Precursor ion ( $m/z$ ) | Product ion ( $m/z$ ) | DP (V) | EP (V) | CE (V) | CXP (V) | Dwell time (msec) |
|--------------|-------------------------|-----------------------|--------|--------|--------|---------|-------------------|
| Rucaparib    | 324                     | 293                   | 50     | 10     | 15     | 20      | 70                |
|              | 324                     | 264                   | 50     | 10     | 35     | 20      | 10                |
| Olaparib     | 435                     | 367                   | 100    | 10     | 29     | 25      | 70                |
|              | 435                     | 281                   | 100    | 10     | 45     | 20      | 10                |
| Niraparib    | 321                     | 304                   | 75     | 10     | 30     | 22      | 70                |
|              | 321                     | 205                   | 75     | 10     | 45     | 15      | 10                |
| Rucaparib IS | 328                     | 285                   | 50     | 10     | 28     | 20      | 30                |
| Olaparib IS  | 443                     | 375                   | 100    | 10     | 30     | 25      | 30                |
| Niraparib IS | 327                     | 310                   | 80     | 10     | 30     | 23      | 30                |

DP: declustering potential, EP: entrance potential, CE: collision energy, CXP: collision-cell exit potential.

**Table S3.** Evaluation of the best weighting factor ( $w$ ) for the linear regression analysis.

| Analyte   | $w$              | SS    | $r$    | AIC     | $\Sigma\%RE$ |
|-----------|------------------|-------|--------|---------|--------------|
| Rucaparib | 1                | 86.08 | 0.8952 | 66.74   | 284.547      |
|           | 1/x              | 18.52 | 0.9385 | -85.58  | 137.06       |
|           | 1/x <sup>2</sup> | 1.12  | 0.9253 | -272.03 | 120.089      |
| Niraparib | 1                | 70.71 | 0.9859 | -98.97  | 298.14       |
|           | 1/x              | 15.43 | 0.9920 | -249.74 | 135.85       |
|           | 1/x <sup>2</sup> | 0.96  | 0.9895 | -429.44 | 112.02       |
| Olaparib  | 1                | 79.32 | 0.9748 | -47.98  | 242.18       |
|           | 1/x              | 17.11 | 0.9860 | -201.44 | 109.67       |
|           | 1/x <sup>2</sup> | 1.05  | 0.9827 | -386.88 | 92.40        |

$w$ : weighting factor ; SS: sum of squares;  $r$ : correlation coefficient; AIC: Akaike's Information Criterion;  $\Sigma\%RE$ : sum of the absolute %RE.

**Table S4.** Precision and accuracy data of calibration curves for both plasma and DBS matrices.

| Analyte | Nominal | Plasma (n=3) | DBS (n=3) |
|---------|---------|--------------|-----------|
|---------|---------|--------------|-----------|

|                                                                 | concentration<br>(ng/mL) | Mean concentration<br>(ng/mL) | CV% | Acc% | Mean<br>concentration<br>(ng/mL) | CV% | Acc% |
|-----------------------------------------------------------------|--------------------------|-------------------------------|-----|------|----------------------------------|-----|------|
| Rucaparib<br>$r \geq 0.9970$ (plasma);<br>$r \geq 0.9988$ (DBS) | 100                      | 100                           | 6   | 100  | 98                               | 3   | 98   |
|                                                                 | 200                      | 198                           | 7   | 99   | 207                              | 4   | 104  |
|                                                                 | 500                      | 502                           | 6   | 100  | 500                              | 3   | 100  |
|                                                                 | 1000                     | 987                           | 6   | 99   | 989                              | 3   | 99   |
|                                                                 | 2000                     | 1988                          | 5   | 99   | 2012                             | 3   | 101  |
|                                                                 | 3000                     | 3001                          | 5   | 100  | 3013                             | 4   | 100  |
|                                                                 | 4000                     | 4066                          | 6   | 102  | 4004                             | 3   | 100  |
|                                                                 | 5000                     | 5015                          | 5   | 100  | 4906                             | 3   | 98   |
| Niraparib<br>$r \geq 0.9993$ (plasma);<br>$r \geq 0.9994$ (DBS) | 60                       | 60                            | 2   | 99   | 59                               | 2   | 99   |
|                                                                 | 120                      | 121                           | 3   | 101  | 122                              | 3   | 101  |
|                                                                 | 300                      | 307                           | 2   | 102  | 307                              | 2   | 102  |
|                                                                 | 600                      | 604                           | 5   | 101  | 596                              | 3   | 99   |
|                                                                 | 1200                     | 1186                          | 2   | 99   | 1190                             | 2   | 99   |
|                                                                 | 1800                     | 1807                          | 2   | 100  | 1774                             | 2   | 99   |
|                                                                 | 2400                     | 2396                          | 4   | 100  | 2426                             | 2   | 101  |
|                                                                 | 3000                     | 2944                          | 2   | 98   | 2973                             | 3   | 99   |
| Olaparib<br>$r \geq 0.9985$ (plasma);<br>$r \geq 0.9993$ (DBS)  | 140                      | 139                           | 4   | 99   | 140                              | 3   | 100  |
|                                                                 | 280                      | 285                           | 4   | 102  | 281                              | 2   | 100  |
|                                                                 | 700                      | 703                           | 4   | 100  | 695                              | 2   | 99   |
|                                                                 | 1400                     | 1396                          | 4   | 100  | 1403                             | 3   | 100  |
|                                                                 | 2800                     | 2795                          | 4   | 100  | 2808                             | 4   | 100  |
|                                                                 | 4200                     | 4130                          | 2   | 98   | 4179                             | 3   | 99   |
|                                                                 | 5600                     | 5580                          | 3   | 100  | 5652                             | 2   | 101  |
|                                                                 | 7000                     | 7081                          | 5   | 101  | 6963                             | 2   | 99   |

Acc%: percentage of accuracy; CV%: coefficient of variation.

**Table S5.** Dilution integrity data for the method in human plasma (n=5).

| Analyte   | Nominal concentration (ng/mL) | Mean concentration (ng/mL) | CV% | Acc% |
|-----------|-------------------------------|----------------------------|-----|------|
| Rucaparib | 1414                          | 1532                       | 5   | 108  |
| Niraparib | 888                           | 920                        | 5   | 104  |
| Olaparib  | 1957                          | 2009                       | 1   | 103  |

Acc%: percentage of accuracy; CV%: coefficient of variation.

**Table S6.** Hematocrit effect (25% and 55% of Hct) on accuracy and precision.

| Analyte   | Nominal concentration (ng/mL) | 25% Hct (n=3)                    |     |      | 55% Hct (n=3)                    |     |      |
|-----------|-------------------------------|----------------------------------|-----|------|----------------------------------|-----|------|
|           |                               | Mean<br>concentration<br>(ng/mL) | CV% | Acc% | Mean<br>concentration<br>(ng/mL) | CV% | Acc% |
| Rucaparib | 100                           | 121                              | 1   | 121  | 91                               | 4   | 91   |
|           | 255                           | 314                              | 4   | 123  | 201                              | 31  | 79   |
|           | 1700                          | 1997                             | 1   | 117  | 1601                             | 5   | 94   |
|           | 4250                          | 5134                             | 4   | 121  | 3702                             | 5   | 87   |

|           |      |      |   |     |      |    |     |
|-----------|------|------|---|-----|------|----|-----|
| Niraparib | 60   | 69   | 3 | 114 | 52   | 4  | 87  |
|           | 153  | 185  | 4 | 121 | 117  | 33 | 76  |
|           | 1020 | 1235 | 3 | 121 | 916  | 7  | 90  |
|           | 2460 | 2973 | 5 | 117 | 2165 | 3  | 85  |
| Olaparib  | 140  | 148  | 3 | 106 | 133  | 1  | 95  |
|           | 357  | 382  | 4 | 107 | 305  | 35 | 85  |
|           | 2380 | 2552 | 1 | 107 | 2407 | 4  | 101 |
|           | 5950 | 6299 | 2 | 106 | 5826 | 1  | 98  |

Acc%: percentage of accuracy; CV%: coefficient of variation; Hct: hematocrit.

**Table S7.** Clinical validation data for rucaparib.

| Sample number | C <sub>pla</sub> (ng/mL) | C <sub>DBS</sub> (ng/mL) | EC <sub>pla</sub> (ng/mL) |
|---------------|--------------------------|--------------------------|---------------------------|
| 1             | 1270                     | 1640*                    | 1149                      |
| 2             | 1069                     | 1602                     | 1123                      |
| 3             | 1526                     | 1957                     | 1372                      |
| 4             | 1773                     | 2368                     | 1660                      |
| 5             | 2007                     | 2676                     | 1876                      |
| 6             | 1526                     | 2124                     | 1489                      |
| 7             | 1119                     | 1808                     | 1267                      |
| 8             | 1049                     | 1679                     | 1177                      |
| 9             | 1045                     | 1736                     | 1217                      |
| 10            | 1701                     | 3238                     | 2269                      |
| 11            | 1287                     | 1946                     | 1364                      |
| 12            | 2116                     | 2626                     | 1840                      |
| 13            | 802                      | 937                      | 657                       |
| 14            | 1667                     | 2388                     | 1674                      |
| 15            | 1082                     | 1371                     | 961                       |
| 16            | 3338                     | 4311                     | 3022                      |

\* mean value from incurred sample reanalysis, obtained with a calibration curve with Hct=41

**Table S8.** Clinical validation data for niraparib.

| Sample number | C <sub>pla</sub> (ng/mL) | C <sub>DBS</sub> (ng/mL) | EC <sub>pla</sub> (ng/mL) |
|---------------|--------------------------|--------------------------|---------------------------|
| 1             | 888                      | 1276*                    | 886                       |
| 2             | 831                      | 1215                     | 844                       |
| 3             | 868                      | 1271                     | 883                       |
| 4             | 831                      | 1471                     | 1022                      |
| 5             | 835                      | 1528                     | 1061                      |
| 6             | 812                      | 1065                     | 739                       |
| 7             | 172                      | 267                      | 185                       |
| 8             | 157                      | 227                      | 157                       |
| 9             | 188                      | 272                      | 189                       |
| 10            | 227                      | 305                      | 212                       |
| 11            | 253                      | 342                      | 237                       |
| 12            | 175                      | 235                      | 163                       |
| 13            | 355                      | 440                      | 306                       |
| 14            | 304                      | 403                      | 279                       |
| 15            | 281                      | 403                      | 280                       |
| 16            | 310                      | 500*                     | 347                       |
| 17            | 246                      | 355                      | 247                       |

|    |      |      |     |
|----|------|------|-----|
| 18 | 425  | 625  | 434 |
| 19 | 498  | 798  | 554 |
| 20 | 134  | 178  | 124 |
| 21 | 390  | 572  | 397 |
| 22 | 236  | 309  | 214 |
| 23 | 414  | 614  | 427 |
| 24 | 558  | 706  | 491 |
| 25 | 358  | 530  | 368 |
| 26 | 433  | 625  | 434 |
| 27 | 1151 | 1308 | 908 |
| 28 | 313  | 436  | 302 |
| 29 | 405  | 745  | 517 |
| 30 | 372  | 479  | 332 |
| 31 | 542  | 746  | 518 |
| 32 | 207  | 356  | 247 |
| 33 | 227  | 361  | 250 |
| 34 | 610  | 970  | 674 |
| 35 | 748  | 1091 | 757 |
| 36 | 244  | 356  | 247 |
| 37 | 313  | 376  | 261 |
| 38 | 308  | 415  | 288 |
| 39 | 707  | 831  | 577 |
| 40 | 329  | 504  | 350 |
| 41 | 567  | 804  | 559 |
| 42 | 547  | 769  | 534 |
| 43 | 403  | 538  | 374 |

\* mean value from incurred sample reanalysis, obtained with a calibration curve with Hct=41

**Table S9.** Clinical validation data for olaparib.

| Sample number | C <sub>pla</sub> (ng/mL) | C <sub>DBS</sub> (ng/mL) | EC <sub>pla</sub> (ng/mL) |
|---------------|--------------------------|--------------------------|---------------------------|
| 1             | 3326                     | 2536*                    | 3531                      |
| 2             | 2651                     | 1915                     | 2666                      |
| 3             | 5290                     | 3893                     | 5420                      |
| 4             | 2244                     | 1543                     | 2149                      |
| 5             | 406                      | 284*                     | 395                       |
| 6             | 323                      | 250                      | 348                       |
| 7             | 390                      | 306                      | 426                       |
| 8             | 375                      | 278                      | 387                       |
| 9             | 868                      | 625                      | 870                       |
| 10            | 1442                     | 1098                     | 1530                      |
| 11            | 632                      | 526                      | 732                       |
| 12            | 738                      | 477                      | 664                       |
| 13            | 1653                     | 1153                     | 1605                      |
| 14            | 2261                     | 1431                     | 1993                      |
| 15            | 1472                     | 826                      | 1150                      |
| 16            | 1062                     | 648                      | 902                       |
| 17            | 2529                     | 1767                     | 2461                      |
| 18            | 1397                     | 1001                     | 1394                      |
| 19            | 1902                     | 1352                     | 1883                      |
| 20            | 2389                     | 1746                     | 2431                      |
| 21            | 2251                     | 1645                     | 2290                      |
| 22            | 361                      | 259                      | 361                       |
| 23            | 785                      | 568                      | 791                       |
| 24            | 583                      | 445                      | 620                       |
| 25            | 809                      | 554                      | 771                       |
| 26            | 1888                     | 1329                     | 1851                      |
| 27            | 659                      | 503                      | 700                       |
| 28            | 335                      | 248                      | 346                       |
| 29            | 983                      | 799                      | 1113                      |
| 30            | 3886                     | 2951                     | 4109                      |
| 31            | 241                      | 148                      | 206                       |

|    |      |      |      |
|----|------|------|------|
| 32 | 496  | 324  | 451  |
| 33 | 625  | 390  | 543  |
| 34 | 354  | 263  | 366  |
| 35 | 574  | 439  | 611  |
| 36 | 621  | 504  | 702  |
| 37 | 1196 | 812  | 1131 |
| 38 | 2489 | 1618 | 2254 |
| 39 | 1268 | 924  | 1287 |
| 40 | 1635 | 1201 | 1672 |
| 41 | 1576 | 1190 | 1657 |
| 42 | 590  | 461  | 642  |
| 43 | 2053 | 1473 | 2052 |
| 44 | 1541 | 1095 | 1524 |
| 45 | 1548 | 1090 | 1518 |
| 46 | 977  | 713  | 993  |
| 47 | 533  | 401  | 558  |
| 48 | 1993 | 1612 | 2245 |
| 49 | 811  | 564  | 786  |
| 50 | 1092 | 691  | 963  |
| 51 | 1299 | 898  | 1251 |
| 52 | 1260 | 927  | 1290 |

\* mean value from incurred sample reanalysis, obtained with a calibration curve with Hct=41

**Table S10.** Incurred sample reanalysis (ISR) for plasma samples.

| Analyte   | 1st analysis | 2nd analysis | %diff |
|-----------|--------------|--------------|-------|
| Rucaparib | 653          | 654          | 0     |
|           | 837          | 775          | 8     |
|           | 878          | 872          | -1    |
| Niraparib | 383          | 380          | 1     |
|           | 694          | 696          | 0     |
|           | 412          | 428          | 4     |
|           | 554          | 551          | -1    |
| Olaparib  | 2694         | 2663         | -1    |
|           | 2851         | 2673         | -6    |
|           | 4355         | 4362         | 0     |
|           | 1331         | 1307         | -2    |

%diff: percentage of difference.

**Table S11.** Incurred sample reanalysis (ISR) for DBS samples.

| Analyte   | 1st analysis | 2nd analysis | %diff |
|-----------|--------------|--------------|-------|
| Rucaparib | 1610         | 1670         | -4    |
|           | 1808         | 1887         | -4    |
|           | 1679         | 1667         | 1     |
|           | 1957         | 1950         | 0     |
| Niraparib | 1306         | 1247         | 5     |
|           | 489          | 512          | -5    |
|           | 267          | 239          | 11    |
| Olaparib  | 304          | 265          | 14    |
|           | 853          | 861          | -1    |
|           | 2665         | 2407         | 10    |
|           | 250          | 220          | 13    |

|  |      |      |    |
|--|------|------|----|
|  | 4202 | 4235 | -1 |
|  | 799  | 783  | 2  |

%diff: percentage of difference.
